# Supplementary material
Source: Royal Society of Chemistry journal article supplement (doi:10.1039/d5ta10078j)
Supplement: d5ta10078j1.pdf [file d5ta10078j1.pdf]

## Supporting Information

### **Stabilization of planar heterojunction solar cells using a dimethyl sulfoxide-treated hole transport layer**

Elaheh Habibzadeh, Joseph Palathinkal Thomas and Kam Tong Leung\*

*WATLab and Department of Chemistry, University of Waterloo, Waterloo, Ontario N2L3G1,  
Canada*

*E-mail: [tong@uwaterloo.ca](mailto:tong@uwaterloo.ca)*

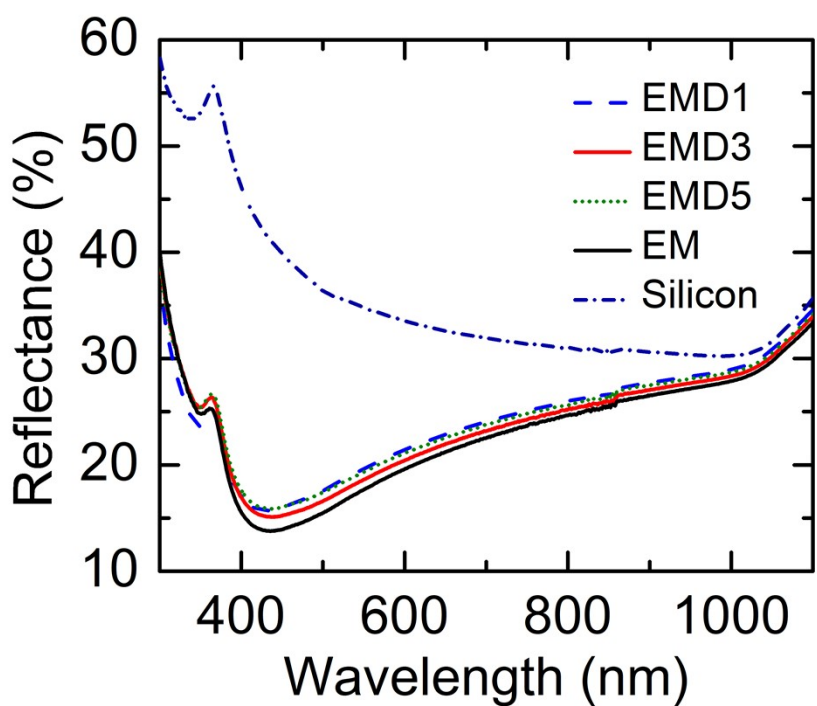

Fig. S1 Reflectance spectra of silicon, and EM, EMD1, EMD3 and EMD5 films deposited on silicon.

Table S1. Performance data of solar cells fabricated with cosolvent-added PEDOT:PSS EM (used as the control solution), and EM with added DMSO of selected concentrations: 1 wt% (EMD1), 3 wt% (EMD3), and 5 wt% (EMD5).

| Solar cell based on as-deposited PEDOT:PSS film | $J_{sc}$ (mA/cm <sup>2</sup> ) | $V_{oc}$ (mV) | FF (%) | PCE (%) |
|-------------------------------------------------|--------------------------------|---------------|--------|---------|
| EMD1                                            | 28.9                           | 632.9         | 61.6   | 11.3    |
| EMD3                                            | 30.1                           | 642.4         | 69.4   | 13.4    |
| EMD5                                            | 27.8                           | 571.7         | 60.7   | 9.6     |
| EM                                              | 28.1                           | 645.1         | 62.6   | 11.4    |

Table S2. Performance data of as-fabricated solar cells with cosolvent-added PEDOT:PSS EMD3 and EM films and after ambient storage of selected hours.

| Solar cell sample | J <sub>SC</sub><br>(mA/cm <sup>2</sup> ) | V <sub>OC</sub><br>(mV) | FF<br>(%) | PCE<br>(%) |
|-------------------|------------------------------------------|-------------------------|-----------|------------|
| EMD3 – 0 h        | 30.1                                     | 642.4                   | 69.4      | 13.4       |
| EMD3 – 48 h       | 29.9                                     | 631.3                   | 66.4      | 12.5       |
| EMD3 – 72 h       | 29.6                                     | 630.6                   | 64.1      | 12.0       |
| EMD3 – 144 h      | 29.6                                     | 624.4                   | 61.0      | 11.3       |
| EMD3 – 168 h      | 29.4                                     | 617.9                   | 58.7      | 10.7       |
| EMD3 – 216 h      | 29.2                                     | 613.0                   | 53.9      | 9.7        |
| EM – 0 h          | 28.1                                     | 645.1                   | 62.6      | 11.4       |
| EM – 24 h         | 28.0                                     | 579.7                   | 45.8      | 7.4        |
| EM – 72 h         | 27.7                                     | 526.8                   | 38.9      | 5.7        |

Table S3. Performance data of solar cells fabricated with cosolvent-added PEDOT:PSS EMD3 and EM films after 72 h of ambient storage. Data for as-fabricated solar cells (without any ambient storage) are given in parentheses. The corresponding reductions (Red.) for the data after 72 h of ambient storage are also given in percentage of the respective as-fabricated values. The three EMD3 cells separately prepared are labelled as #1, #2, and #3.

| Solar cell sample after 72 h ambient storage | J <sub>SC</sub><br>(mA/cm <sup>2</sup> ) | Red.<br>(%) | V <sub>OC</sub> (mV)         | Red.<br>(%) | FF (%)                     | Red.<br>(%) | PCE (%)                    | Red.<br>(%) |
|----------------------------------------------|------------------------------------------|-------------|------------------------------|-------------|----------------------------|-------------|----------------------------|-------------|
| EMD3 #1                                      | 29.6<br>(30.1)                           | 1.5         | 630.6<br>(642.4)             | 1.8         | 64.1<br>(69.4)             | 7.5         | 12.0<br>(13.4)             | 10.6        |
| EMD3 #2                                      | 30.1<br>(30.3)                           | 0.5         | 639.5<br>(648.6)             | 1.4         | 53.2<br>(63.1)             | 15.7        | 10.3<br>(12.4)             | 17.3        |
| EMD3 #3                                      | 30.0<br>(30.0)                           | 0.3         | 639.2<br>(646.1)             | 1.1         | 56.6<br>(64.8)             | 12.7        | 10.8<br>(12.6)             | 13.9        |
| Average                                      | 29.9 ± 0.3<br>(30.1 ± 0.2)               | 0.8         | 636.4 ± 5.1<br>(645.7 ± 3.1) | 1.4         | 58.0 ± 5.6<br>(65.8 ± 3.3) | 12.0        | 11.0 ± 0.9<br>(12.8 ± 0.5) | 13.9        |
| EM                                           | 27.7<br>(28.1)                           | 1.4         | 526.8<br>(645.1)             | 18.3        | 38.9<br>(62.6)             | 37.9        | 5.7<br>(11.4)              | 50.1        |

Table S4. Performance data of six solar cells fabricated with cosolvent-added PEDOT:PSS EMD3 films.

| Solar cell as-fabricated with EMD3 | $J_{SC}$<br>(mA/cm <sup>2</sup> ) | $V_{OC}$<br>(mV) | FF<br>(%)  | PCE<br>(%) |
|------------------------------------|-----------------------------------|------------------|------------|------------|
| #1                                 | 30.1                              | 642.4            | 69.4       | 13.4       |
| #2                                 | 30.3                              | 648.6            | 63.1       | 12.4       |
| #3                                 | 30.0                              | 646.1            | 64.8       | 12.6       |
| #4                                 | 29.9                              | 619.9            | 64.7       | 12.0       |
| #5                                 | 28.6                              | 644.9            | 65.0       | 12.0       |
| #6                                 | 28.8                              | 645.1            | 63.7       | 11.8       |
| Average                            | 29.6 ± 0.7                        | 641.2 ± 10.6     | 65.1 ± 2.2 | 12.4 ± 0.6 |

Table S5. Repeated measurement test of performance data for solar cells fabricated with cosolvent-added PEDOT:PSS EMD3 and EM films.

| Solar cell as-fabricated with cosolvent-added PEDOT:PSS | $J_{SC}$<br>(mA/cm <sup>2</sup> ) | $V_{OC}$ (mV) | FF (%)     | PCE (%)    |
|---------------------------------------------------------|-----------------------------------|---------------|------------|------------|
| EMD3 – first measurement                                | 29.9                              | 642.2         | 69.3       | 13.3       |
| EMD3 – second measurement                               | 30.1                              | 642.4         | 69.4       | 13.4       |
| Average                                                 | 30.0 ± 0.1                        | 642.3 ± 0.1   | 69.4 ± 0.1 | 13.4 ± 0.1 |
|                                                         |                                   |               |            |            |
| EM – first measurement                                  | 28.03                             | 643.8         | 62.6       | 11.3       |
| EM – second measurement                                 | 28.1                              | 645.1         | 62.6       | 11.4       |
| Average                                                 | 28.1 ± 0.1                        | 644.5 ± 0.9   | 62.6 ± 0.0 | 11.4 ± 0.1 |
